# 1 Dose-dependent effects of inhaled 2 corticosteroids on bone mineral density in 3 postmenopausal women with asthma or 4 COPD: A registry-based cohort study

---

5 **Authors:** Wenjia Chen PhD<sup>1,2\*</sup>, Kate M. Johnson MSc<sup>1\*</sup>, J. Mark FitzGerald MD<sup>2</sup>, Mohsen  
6 Sadatsafavi MD PhD<sup>1,2,3</sup>, William D. Leslie MD MSc<sup>4</sup>.

7 \* co-first author

## 8 **Affiliations:**

9 1. Collaboration for Outcomes Research and Evaluation, Faculty of Pharmaceutical Sciences,  
10 University of British Columbia, Vancouver, Canada

11 2. Institute for Heart and Lung Health, Department of Medicine, the University of British  
12 Columbia, Vancouver, Canada

13 3. Centre for Clinical Epidemiology and Evaluation, Vancouver Coastal Health Institute,  
14 Vancouver, Canada

15 4. Department of Internal Medicine, University of Manitoba, Winnipeg, Manitoba, Canada

16

17 **Corresponding Author:** Mark FitzGerald

18 Institute for Heart and Lung Health, Department of Medicine,

19 University of British Columbia,

20 2775 Laurel St, Vancouver, BC Canada V5Z 1M9

21 Email: [mark.fitzgerald@vch.ca](mailto:mark.fitzgerald@vch.ca), Phone: 1-604-875-4122

22 Running Title: Impact of Inhaled Corticosteroids on bone density

23 Table Count: 1

24 Figure Count 3:

25 Word Count: 3,389 (excluding title page, abstract, references, figures and tables)

26 **Funding:** MS receives salary support from the Canadian Institutes of Health Research and

27 Michael Smith Foundation for Health Research.

28 **Conflict of Interest:** JMF has served on advisory boards for Novartis, Pfizer, AstraZeneca,

29 Boehringer-Ingelheim, and Merck. He has also been a member of speakers' bureaus for

30 AstraZeneca, Boehringer-Ingelheim, Novartis, and Merck. He has received research funding paid

31 directly to the University of British Columbia from AstraZeneca, Glaxo-SmithKline, Boehringer-

32 Ingelheim, Merck, Sanofi, and Novartis. Dr. FitzGerald is a member of the Global Initiative for

33 Asthma (GINA) Executive and Science Committees. Dr. Sadatsafavi receives salary support

34 from the Canadian Institutes of Health Research and Michael Smith Foundation for Health

35 Research. WDL, MS, KJ, and WC have no conflicts to declare.

36 **Author Contributions:** WDL, MS, and JMF formulated the study idea. WDL designed the

37 study and performed all data analyses. JMF and MS contributed to the study design and

38 interpretation of findings. WC and KJ and wrote the first draft of the manuscript (they are co-

39 first authors). All authors critically commented on the manuscript and approved the final version.

40 WDL is the guarantor of the manuscript.

41 **ABSTRACT**

42 **Background:** The effect of long-term inhaled corticosteroid (ICS) therapy on the bone health of  
43 older adults remains unclear due to its possible impact on bone mineral density (BMD).

44 **Objective:** To evaluate, cross-sectionally and longitudinally, the impact of ICS use on BMD in  
45 postmenopausal women with asthma or chronic obstructive pulmonary disease (COPD).

46 **Methods:** We used a population-based bone densitometry registry linked with administrative  
47 health data of the province of Manitoba, Canada (1999– 2013), to identify women with  
48 diagnosed asthma or COPD. ICS use was defined as cumulative dispensed days prior to baseline  
49 BMD (cross-sectional analysis), and medication possession ratio (MPR) between two BMD  
50 measurements (longitudinal analysis). Results were adjusted for multiple covariates including the  
51 underlying respiratory diagnosis and its severity.

52 **Results:** In the cross sectional analysis, compared with non-users, women with the highest tertile  
53 of prior ICS exposure had lower baseline BMD at the femoral neck (-0.09 standard deviations  
54 [SD] below a healthy young adult, 95% CI: -0.16, -0.02) and total hip (-0.14 SD, 95% CI: -0.22,  
55 -0.05), but not at the lumbar spine. Longitudinally, the highest tertile of ICS exposure was  
56 associated with a slight decline in total hip BMD relative to non-users (-0.02 SD/year, 95% CI: -  
57 0.04, -0.01), with no significant effect at the femoral neck and lumbar spine. Middle and lower  
58 tertiles of ICS use had no significant effects.

59 **Conclusion:** High exposure to ICS was associated with a small adverse effect on baseline hip  
60 BMD and total hip BMD loss in post-menopausal women with asthma or COPD.

61

62 **Abstract word count:** 250

63

64 **What is the key question?** What is the safety of long-term use of inhaled corticosteroids in  
65 postmenopausal women with chronic respiratory disease?

66 **What is the bottom line?** Postmenopausal women with over 50% adherence to inhaled  
67 corticosteroids tend to have slightly accelerated bone mineral density loss at the total hip, but  
68 overall this loss was very minor.

69 **Why read on?** For clinicians making treatment decisions that must balance efficacy and risk of  
70 side effects, this study provides a population-based assessment of the long-term dose-response  
71 association between inhaled corticosteroids and bone mineral density, and highlights the need to  
72 maintain minimally effective doses in this patient group.

73

74 **Keywords:** Bone mineral density, inhaled corticosteroids, asthma, chronic obstructive  
75 pulmonary disease, osteoporosis, administrative data

## 76 INTRODUCTION

77 Inhaled corticosteroids (ICS) are commonly used in the management of chronic diseases of the  
78 airways due to their impact on airway inflammation. ICS reduce the rate of exacerbations,  
79 decrease respiratory symptoms, improve lung function and quality of life in patients with  
80 asthma<sup>1</sup>. The use of ICS in chronic obstructive pulmonary disease (COPD) is less well  
81 established, but it has been shown to reduce exacerbations in moderate to severe COPD,  
82 especially in combination with a long acting beta agonist<sup>2,3</sup>.

83  
84 Despite its efficacy, the safety of long-term ICS use remains contentious. In particular, ICS use is  
85 strongly associated with an increased risk of pneumonia<sup>4</sup>, and more moderately associated with  
86 decreases in bone mineral density (BMD)<sup>5-9</sup>, and an increased risk of fractures<sup>10</sup>, although  
87 several meta-analyses have found no effect<sup>4,11</sup>. The relationship between ICS and BMD is  
88 generally found to be dose-dependent<sup>5,6,9</sup>, however, the typical dosage assessed in these studies is  
89 high. A population-based assessment of long-term ICS use at a wide range of doses would be  
90 relevant from both a pathophysiological perspective and to clinicians making treatment decisions  
91 that must balance safety and efficacy. In particular, the dose at which ICS has an impact on  
92 BMD might depend on the age and sex of the patient<sup>4,9,12,13</sup>, and the safe dose may be lower in  
93 populations in which natural bone loss is more pronounced, such as in postmenopausal women<sup>14</sup>.  
94 However, the association between ICS use and BMD decline has not been well studied in this  
95 population. There is evidence that the impact of ICS on BMD is greater in postmenopausal than  
96 in premenopausal women<sup>8</sup>, although the sample sizes of studies of postmenopausal women have  
97 tended to be small<sup>7,8</sup>. More detailed evaluation of the dose-response relationship between ICS  
98 therapy and BMD in postmenopausal women with chronic airway diseases is needed to

99 determine whether preventative therapy is necessary to reduce BMD decline and the risk of  
100 fractures.

101  
102 The objective of this study was to examine the impact of ICS on BMD loss in postmenopausal  
103 women with asthma or COPD in routine clinical practice. We hypothesized that in women with  
104 asthma or COPD, after controlling for disease severity and patient characteristics, BMD is lower  
105 in those exposed to ICS compared with unexposed women, and that BMD declines more rapidly  
106 with increasing exposure to ICS.

## 107 **METHODS**

### 108 **Data sources**

109 The province of Manitoba, Canada, provides universal health care to its population of 1.3 million  
110 residents (as of 2016)<sup>15</sup>. The administrative needs of maintaining the public health care system  
111 have resulted in the creation of centralized health care databases, which comprehensively capture  
112 information about hospital discharges, physician billing claims, prescription medication  
113 dispensations as well as demographics, registration and vital statistics. These databases have low  
114 rates of missing data and high validity<sup>16-18</sup>. The current study was based on bone densitometry  
115 services provided between April 1, 1999 and March 31, 2013 under a province-wide bone  
116 densitometry program<sup>19</sup>. The population-based clinical BMD registry records information related  
117 to all bone densitometry services in the province since 1990 (completeness and  
118 accuracy $\geq$ 99%)<sup>20</sup>. The BMD registry was linked at the individual level with other population-  
119 based provincial health administrative data held by the Manitoba Centre for Health Policy Data  
120 Repository via an encrypted personal health number. The study was approved by the Human

121 Research Ethics Board of the University of Manitoba. Data access permission was obtained from  
122 the Manitoba Health Information Privacy Committee.

### 123 Study population

124 This retrospective cohort study had both cross-sectional and longitudinal components. **Figure 1**  
125 displays the schematic presentation of the study design. The study population consisted of  
126 women who were at least 40 years of age, had continuous health care coverage for at least 3  
127 years prior to undergoing their first BMD test, and had a previous diagnosis of asthma or COPD.  
128 These diagnoses were identified by the presence of one or more hospitalizations or two or more  
129 physician claims with diagnostic codes for asthma or COPD, during the 3-year period prior to the  
130 first BMD test. Asthma-specific inpatient and outpatient encounters were determined based on  
131 International Classification of Diseases, 9<sup>th</sup> Edition (ICD-9) codes of 493.x, and ICD-10 codes of  
132 J45.x, J46.x. COPD-specific encounters were determined by ICD-9 codes of 491.xx, 492.xx,  
133 493.2x, 496.xx, and ICD-10 codes of J43.xx, J44.xx. For each patient, the *index date* was defined  
134 as the date of first (baseline) BMD measurement.

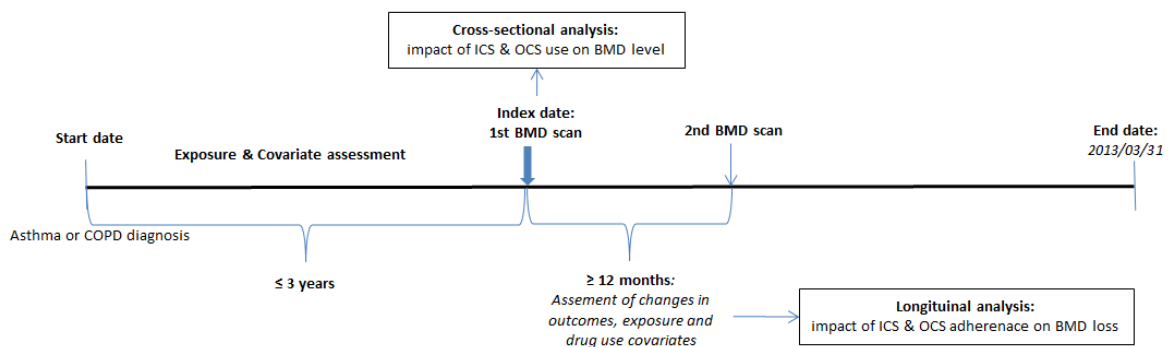

135  
136 **Figure 1.** Schematic presentation of study design. BMD, bone mineral density; COPD, chronic  
137 obstructive pulmonary disease, ICS, inhaled corticosteroids; OCS: oral corticosteroids.

## 138 **Outcomes**

139 BMD testing was performed using dual-energy X-ray absorptiometry scans of the hip and spine  
140 with a pencil-beam instrument (Lunar DPX; GE Lunar, Madison WI, USA) prior to 2000 and  
141 fan-beam instruments (Lunar Prodigy or iDXA; GE Lunar) afterwards. The program's quality  
142 assurance is under strict supervision by a medical physicist<sup>19</sup>. Instruments were cross-calibrated  
143 and no clinically significant differences were detected<sup>20</sup> The instruments used for this study  
144 exhibited stable long-term performance (coefficient of variation <0.5%). All reporting physicians  
145 and supervising technologists are required to maintain DXA certification with the International  
146 Society for Clinical Densitometry (ISCD).

147 BMD was measured at the femoral neck, total hip, and lumbar spine (L1-4). The primary site for  
148 the cross-sectional analysis was the femoral neck as this is the reference standard for description  
149 of osteoporosis diagnosis and for fracture risk assessment<sup>21</sup>. To examine the cross-sectional  
150 association between ICS use and baseline BMD, we reported BMD as measured in the first scan  
151 in T-scores (i.e., the number of standard deviations above or below the mean of a healthy young  
152 adult white female<sup>22</sup>). Hip T-scores were calculated using U.S. National Health and Nutrition  
153 Examination Survey (NHANES) III reference values<sup>21</sup>. Lumbar spine T-score calculations used  
154 manufacturer's reference data for U.S. white females<sup>23</sup>.

155 We examined the longitudinal loss in BMD between the first and second scans as the change in  
156 T-scores divided by the time in years between the two scans where the second scan was at least  
157 12 months after the baseline examination. The primary site for the longitudinal analysis was the  
158 total hip since it has the best test-retest precision and is the least affected by age-related  
159 degenerative artifact<sup>24</sup>.



## 160 **Exposures**

161 All exposure measures were obtained from the comprehensive provincial pharmacy system using  
162 data from the Drug Program Information Network (DPIN)<sup>17</sup>. The use of ICS was measured in  
163 multiple ways. Cumulative dispensed days (primary exposure) and total dispensed quantity (mcg  
164 of beclomethasone equivalent, secondary exposure) of ICS use prior to the index date were used  
165 for the cross-sectional analysis. For the longitudinal analyses, the dispensed days between the  
166 two BMD measurements, measured by medication possession ratio (MPR) was used. MPR was  
167 defined as the ratio of days that a patient was on medication divided by the total number days  
168 observed for that patient (a value between 0 and 1). As such, its definition is independent of the  
169 length of the time window. As a secondary longitudinal exposure, we also measured total  
170 dispensed quantity of ICS between the two scans, which was normalized for time (divided by the  
171 time interval between the two scans).

172 For each exposure definition, based on the tertiles of exposure, ICS use was classified into four  
173 categories: none, lowest-, middle- and highest tertile. The reference category was none (no use).

## 174 **Statistical analyses**

175 All analyses were performed with Dell Statistica (Version 13.0, Dell Inc. 2015). A 2-sided P-  
176 value of 0.05 was set as the threshold for assessing statistical significance.

177 For the cross-sectional analysis, we used generalized linear models with analysis of covariance to  
178 estimate the association between the history of ICS use and the levels of BMD at baseline, with  
179 parallel analyses performed for each of the three different BMD measurement sites. We used  
180 BMD T-score as the outcome and tertiles of ICS use prior to the first BMD scan as the main

181 exposure. We adjusted for major respiratory diagnosis (COPD or asthma), covariates from the  
182 Fracture Risk Assessment Tool (FRAX<sup>25</sup>): age, body mass index (BMI), self-reported parental  
183 hip fracture and smoking status on the index date, as well as history of major fracture,  
184 rheumatoid arthritis (based on ICD codes), and high alcohol intake (alcohol/substance abuse  
185 diagnosis, based on ICD codes) assessed prior to the index date from administrative data. We  
186 also adjusted for use of osteoporosis medications (bisphosphonates, calcitonin, systemic estrogen  
187 products, raloxifene, teriparatide). In addition, to account for the potential confounding effect of  
188 disease severity, we also adjusted for total number of dispensed days (in tertiles) of oral  
189 corticosteroids (OCS, expressed as the MPR between the two tests), and the number of  
190 asthma/COPD-related hospitalizations and physician visits in the 3 years prior to the index date.  
191 We tested the interaction effects of disease diagnosis and ICS use on BMD loss in an exploratory  
192 analysis. In a sensitivity analysis we replaced days of ICS use with total dispensed quantity of  
193 ICS (beclamethasone-equivalents) as the alternative exposure.

194 For the longitudinal analysis, we regressed the effects of ICS (primary exposure: MPR,  
195 secondary exposure: time-adjusted total dispensed quantity) on the longitudinal annual changes  
196 in BMD (expressed as T-score SD/year) between the two consecutive BMD tests, with parallel  
197 analyses performed for changes in all three BMD measurement sites. We conducted a sensitivity  
198 analysis in which we repeated the longitudinal analysis for the subgroup of women who did not  
199 have any estrogen or osteoporosis medication exposure during the observation period.

## 200 **RESULTS**

### 201 **Cross-sectional analysis: association between history of ICS use and baseline BMD**

202 The cross-sectional sample included 6,561 female patients aged 40 years and above, including  
 203 63% with a primary diagnosis of COPD and 37% with asthma, respectively (Table 1). The  
 204 average age at baseline was 65.2 years (SD=10.8). Approximately, 51% of patients had ever used  
 205 ICS prior to BMD testing and were divided into 3 tertiles based on total days of usage (lowest  
 206 tertile: 1-155 days of use, middle: 156-719 days, highest: above 720 days). The mean T-scores of  
 207 hip, femoral neck and lumbar spine were -1.0, -1.5 and -1.1, respectively. Based on the lowest  
 208 score across the sites, osteoporosis was prevalent in 31% of patients at baseline.

209 **Table 1.** Descriptive characteristics of the study sample

|                                         | <b>Overall</b> |
|-----------------------------------------|----------------|
| <b>Cross-sectional sample (n=6,561)</b> |                |
| Diagnosis, n%                           |                |
| <i>COPD</i>                             | 4,110 (62.6)   |
| <i>Asthma</i>                           | 2,451 (37.4)   |
| Age, years                              | 65.2 ± 10.8    |
| Body mass index, kg/m <sup>2</sup>      | 28 ± 6.3       |
| Prior fracture, n%                      | 1,119 (17.1)   |
| Rheumatoid arthritis                    | 251 (3.8)      |
| High alcohol intake                     | 380 (5.8)      |
| Current smoker                          | 936 (21.1)     |
| Parental hip fracture                   | 565 (12.7)     |
| Any ICS use                             | 2,626 (40.0)   |
| Any oral corticosteroid use             | 3,274 (49.9)   |
| Any osteoporosis drug use               | 3,427 (52.2)   |
| Lumbar spine T-score                    | -1.1 ± 1.5     |
| Femoral neck T-score                    | -1.5 ± 1.0     |
| Total hip T-score                       | -1.0 ± 1.3     |
| Minimum site osteoporotic <sup>†</sup>  | 2,050 (31.2)   |
| Days of prior ICS use, n%               |                |
| None                                    | 2,626 (40.0)   |
| Lowest tertile (1-155 days)             | 1,323 (20.2)   |
| Middle tertile (156-719 days)           | 1,301 (19.8)   |
| Highest tertile (>719 days)             | 1,311 (20.0)   |
| Days of prior OCS use, n%               |                |
| None                                    | 3,274 (49.9)   |
| Lowest tertile (1-90 days)              | 1,149 (17.5)   |
| Middle tertile (91-365 days)            | 1,052 (16)     |
| Highest tertile (>366 days)             | 1,086 (16.6)   |

| <b>Longitudinal sub-sample (N=1807)</b> |                |
|-----------------------------------------|----------------|
| Diagnosis, n%                           |                |
| <i>COPD</i>                             | 1,066 (59.0)   |
| <i>Asthma</i>                           | 741 (41.0)     |
| BMD interval, years                     | 4.8 ± 2.4      |
| Change in lumbar spine T-score, SD/y    | 0.011 ± 0.156  |
| Change in femoral neck T-score, SD/y    | -0.027 ± 0.098 |
| Change in total hip T-score, SD/y       | -0.025 ± 0.112 |
| Adherence to ICS, MPR, n%               |                |
| None                                    | 890 (49.3)     |
| Lowest tertile (≤0.16)                  | 302 (16.7)     |
| Middle tertile (0.17-0.50)              | 303 (16.8)     |
| Highest tertile (>0.50))                | 301 (16.7)     |

210 Values are mean ± standard deviation or n (%).

211 COPD, chronic obstructive pulmonary disease.

212 \*P-values were obtained from student T-test.

213 †Osteoporosis was defined as -2.5 or lower in T-scores based on the minimum T-score obtained  
214 from the three sites.

215 Figure 2 shows the association between total days of ICS use prior to BMD testing and the BMD

216 T-scores at baseline. Prior ICS exposure was associated with lowered baseline T-scores for the

217 femoral neck (p=0.005) and total hip (p=0.002), but not for the lumbar spine (p=0.12).

218 Specifically, the highest tertile of prior ICS days was associated with lowered T-scores compared

219 to no ICS use in femoral neck and total hip (-0.09 [95% CI: -0.16, -0.02, p=0.009], -0.14 [95%

220 CI: -0.22, -0.05, p=0.001], respectively). The effects of lowest and middle tertiles of ICS use

221 were not significantly different from non-users across three sites. The effects of prior ICS

222 exposure on baseline T-scores did not significantly differ between the COPD and asthma patients

223 (p=0.52 for the interaction term between disease and ICS use).

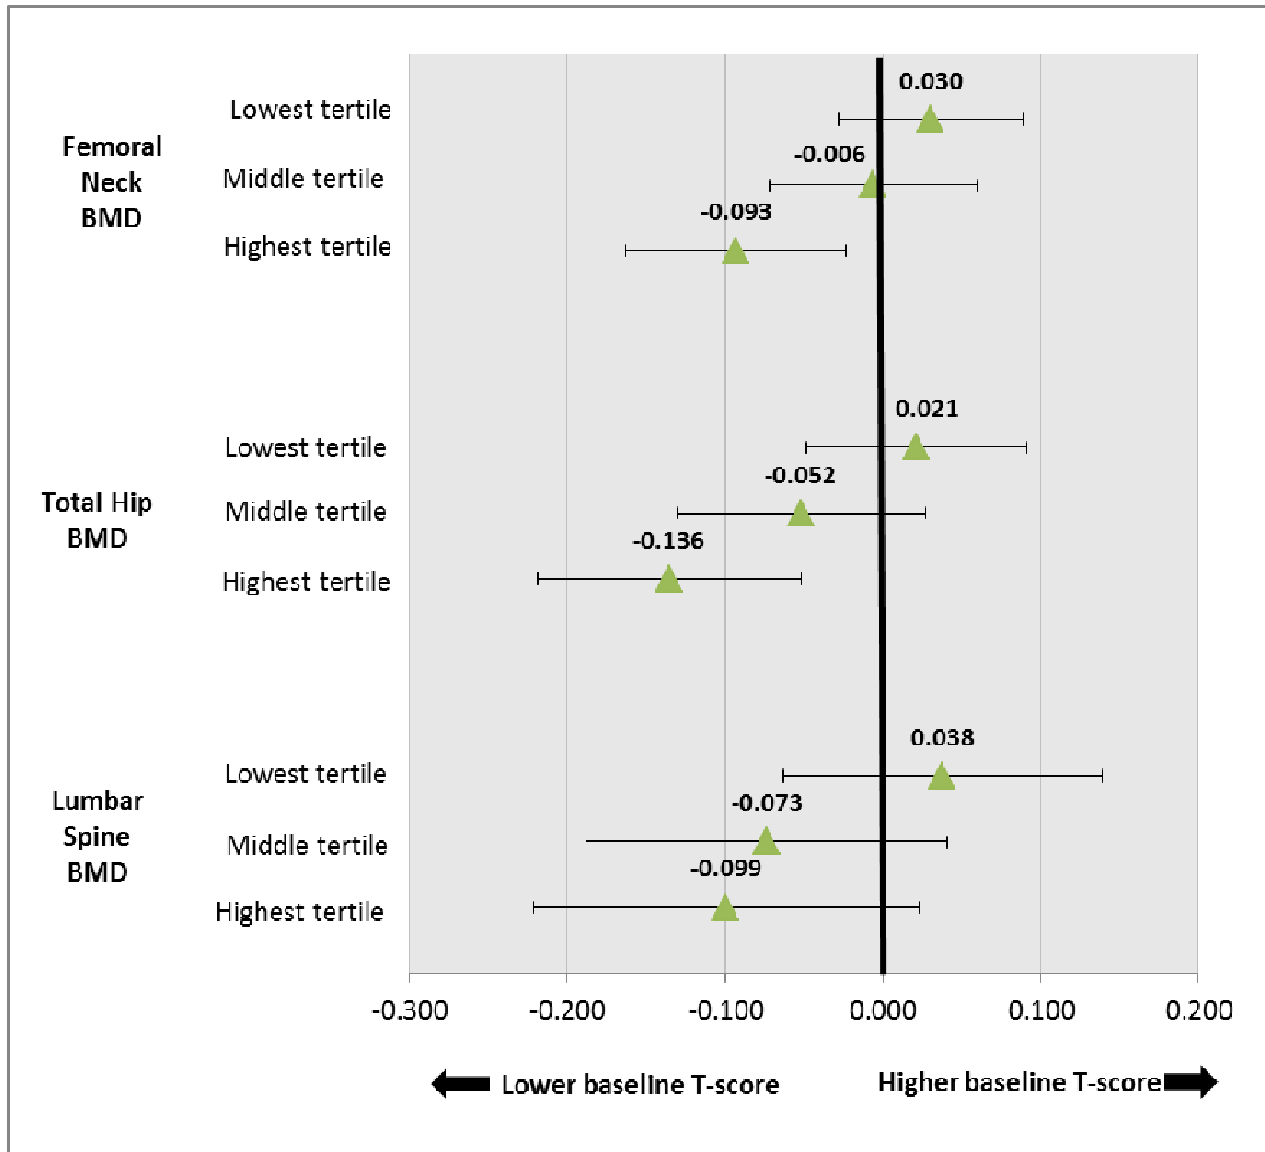

224

225 **Figure 2.** Cross-sectional association between history of ICS use and baseline BMD T-scores  
226 from the multiple linear regression models for the (top) femoral neck, (middle) total hip, and  
227 (bottom) lumbar spine. Drug use was measured as the total number of dispensed days of ICS  
228 before 1<sup>st</sup> BMD scan and was categorized into tertiles, with the reference group being “No Use”.  
229 Lowest tertile, 1-155 days of ICS use, middle tertile, 156-719 days, highest tertile, above 720  
230 days. Error bars show the 95% confidence interval. BMD, bone mineral density; ICS, inhaled  
231 corticosteroid.

232 In the secondary analysis, we changed the main exposures from the total days to the total  
233 dispensed quantity of prior ICS use. Results were consistent for all three sites: compared to no  
234 use, the highest tertile of ICS quantities (>840,000mcg of beclomethasone equivalent) was  
235 associated with lower baseline T-scores for the femoral neck (-0.09 [95% CI: -0.16, -0.02,  
236 p=0.006]) and total hip (-0.15 [95% CI: -0.23, -0.06, p<0.001]), but not for lumbar spine  
237 (p=0.11).

### 238 **Longitudinal analysis: effects of ICS exposure on BMD change**

239 From the initial sample, we identified 1,807 women (59% COPD, 41% asthma) who received a  
240 second BMD scan that occurred at least 12 months after baseline scan. The average time interval  
241 between the first and second scans was 4.8 years (SD=2.4). ICS were used in 51% of patients  
242 between the two scans, with each tertile of ICS MPR comprised of 17% of patients (lowest:  
243 <0.16, middle: 0.16-0.50, highest: >0.50). From baseline to the second BMD scan, total hip and  
244 femoral neck T-scores had decreased (-0.025 SD/year and -0.027 SD/year, respectively), but the  
245 lumbar spine T-score increased (+0.011 SD/year) (Table 1).

246 Figure 3 shows the longitudinal change in BMD T-scores across levels of ICS use. Overall, ICS  
247 use only had a significant effect on the longitudinal decline of BMD at the total hip site  
248 (p=0.025) but not at lumbar spine or femur neck (p-values: 0.25, 0.68, respectively). The highest  
249 tertile of ICS MPR versus no use was associated with a significant decline in total hip T-score (-  
250 0.024 SD/year [95% CI: -0.040, -0.008], p=0.003), whereas the lowest and middle tertiles of  
251 MPR had no significant effects. The highest tertile of MPR also led to a borderline decline in  
252 lumbar spine T-score (-0.024 SD/year [95% CI: -0.047, 0.000], p=0.050). When women with  
253 estrogen or osteoporosis medication exposure were excluded from the sample, the highest tertile

254 of ICS MPR still predicted a borderline loss in total hip BMD T-scores but not in other sites (-  
255 0.026 SD/year [95% CI: -0.051, 0.000], p=0.047).

256 In the secondary analysis which used time-normalized, between-scan total dispensed quantity of  
257 ICS as the exposure variable, results were consistent with the primary analysis: only the highest  
258 tertile of ICS quantities (>124,875 mcg of beclomethasone equivalent, time-normalized) was  
259 associated with BMD decline in total hip compared to no use (-0.020 SD/year [95% CI: -0.035,-  
260 0.004], p=0.016), whereas ICS quantity had no significant effect on other sites.

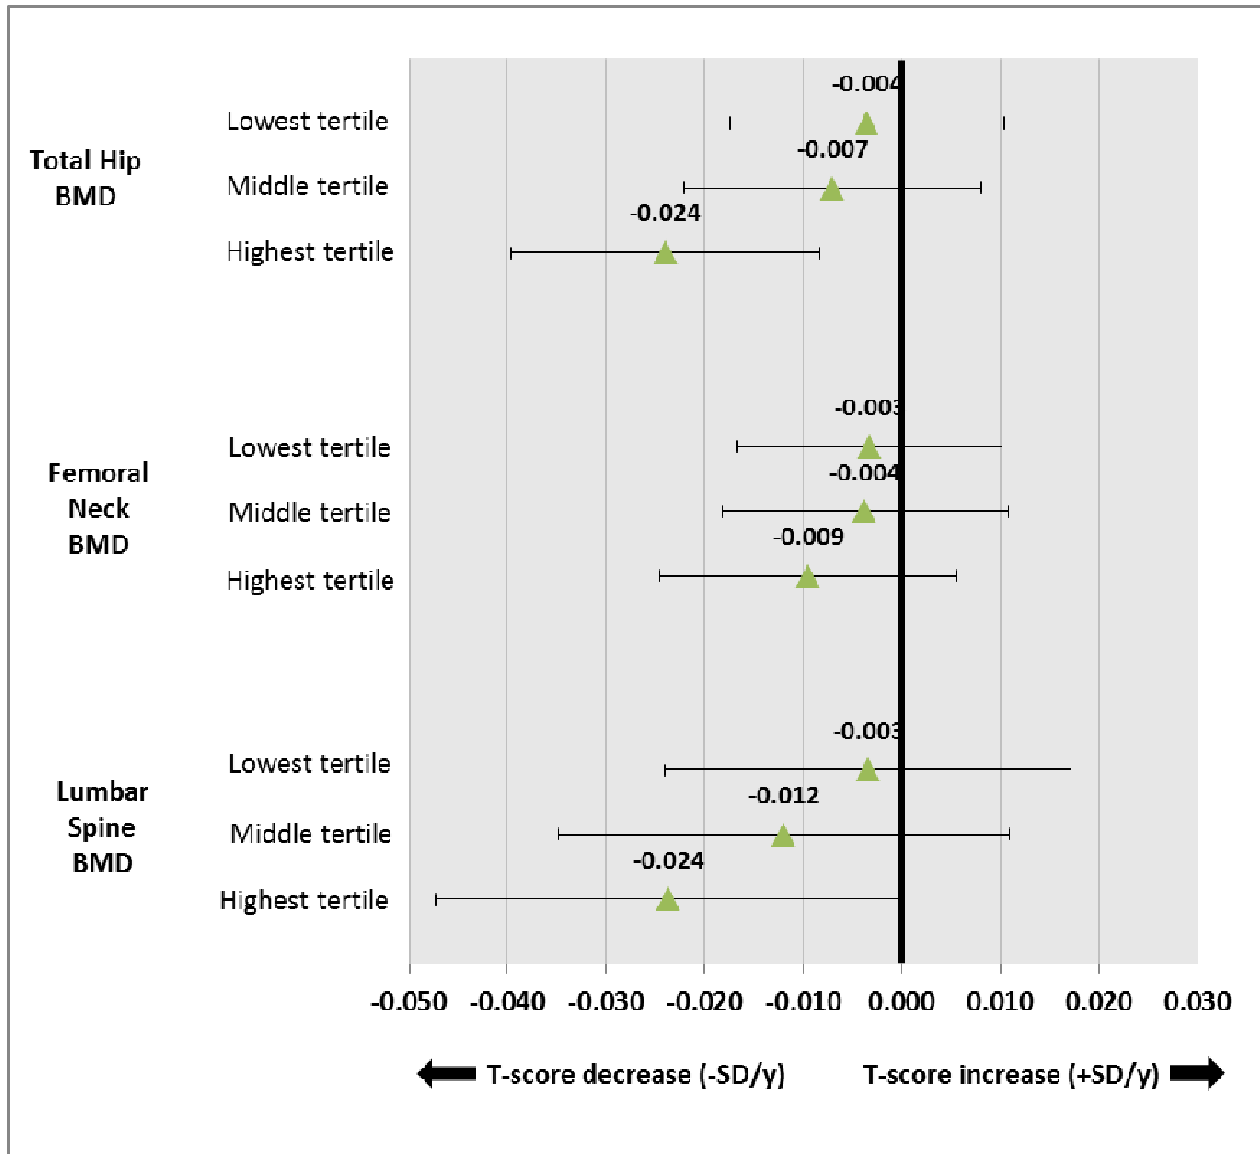

261

262 **Figure 3.** Longitudinal effects of medication possession ratio (MPR) of ICS use on annualized  
263 changes in BMD T-scores from the multiple linear regression analysis for the (top) total hip,  
264 (middle) femoral neck, and (bottom) lumbar spine. MPR of drug use was measured between 1<sup>st</sup>  
265 and 2<sup>nd</sup> BMD scan and categorized into tertiles, with the reference group being “No Use”.  
266 Lowest tertile: <0.16, middle tertile: 0.16-0.50, highest tertile: >0.50. Error bars show the 95%  
267 confidence interval. BMD, bone mineral density; ICS, inhaled corticosteroid,  $\pm$ SD/y, changes in  
268 T-score standard deviation per year.



## 269 **DISCUSSION**

270 We used administrative health data of a well-defined geographic area with complete health care  
271 coverage linked with a bone densitometry database to examine the cross-sectional and  
272 longitudinal impact of ICS use on BMD in postmenopausal women with previously diagnosed  
273 asthma or COPD. In the cross-sectional analysis, the highest tertile of ICS use (previous use of  
274 more than 720 days) was found to negatively impact BMD at the total hip and femoral neck after  
275 taking into account an index of disease severity and common fracture risk factors. In the  
276 longitudinal analyses, receiving ICS for more than 50% of the time between the two scans was  
277 associated with a modest decline in total hip bone density. Overall, these associations are  
278 considered weak. In the cross-sectional analysis, only patients with two or more years of prior  
279 exposure to ICS had baseline bone density lower than the non-users, with the T-score reduction  
280 much less than one standard deviation for the femoral neck (SD=0.14) and total hip (SD=0.13).  
281 Moreover, in the longitudinal analysis, the minor BMD loss (-0.024 SD/year) in total hip among  
282 patients with over 50% adherence to ICS (highest tertile) would need to be sustained for over 40  
283 years to produce one standard deviation reduction in total hip BMD.

284 Our findings are in line with other studies that have found an association between ICS therapy  
285 and minor BMD loss<sup>5-9</sup>, and this response is generally observed to be dose-dependent<sup>5,6,9</sup>. In  
286 general, the patients in our study were receiving low dose ICS therapy; 85% of patients were  
287 dispensed less than 5 puffs (100mcg/puff) of beclomethasone-equivalent per day, although actual  
288 medication intake is likely even lower<sup>28</sup>. Similar to Wong et al.<sup>6</sup>, we observed a dose-dependent  
289 response between cumulative dispensed quantity and baseline BMD in the cross-sectional  
290 analysis, and only the highest tertile of MPR was associated with a decline in BMD. However,

291 the ICS doses observed here are lower than doses that have previously been observed to have a  
292 negative effect on BMD<sup>8,9</sup> or the risk of fractures<sup>29</sup>. Indeed, a pooled analysis of six  
293 observational studies found that ICS had a minimal impact on the risk of fractures when the dose  
294 of beclomethasone equivalent was below 500 mcg per day<sup>10</sup>. However, women were  
295 underrepresented in this analysis, and our study provides some evidence to suggest that the safe  
296 dosage may be lower for postmenopausal women than in other populations. Pooled analyses that  
297 found no impact of ICS on BMD<sup>11,12</sup> may have benefited from subgroup analyses within this  
298 population at risk of osteoporosis.

299 The impact of ICS use on BMD varied between bone sites. The hip was the only site at which we  
300 observed an effect in both the cross-sectional and longitudinal analyses, and BMD at the lumbar  
301 spine was not significantly affected by ICS use in both analyses. These differences may be due to  
302 age-related degenerative changes, which are particularly common in the lumbar spine. Although  
303 we did not observe a strong association between ICS use and BMD, it is possible that the  
304 positive impact of ICS therapy on patient mobility and respiratory function offset its negative  
305 impact on BMD and resulted in a smaller net effect. For example, van Staa et al.<sup>30</sup> found that ICS  
306 use increased the risk of fractures in respiratory patients, but respiratory patients not on ICS  
307 therapy still had a higher risk of fractures than healthy controls, suggesting the increased risk of  
308 fractures was due to the respiratory disease itself rather than ICS use.

309 Our study has several strengths. First, we assessed ICS use and initial bone density in 6,561  
310 patients, and the change in bone density over an average of five years for 1,087 patients, which is  
311 a very robust sample size compared to previous studies<sup>5,8,31</sup>. The registry-based nature of the  
312 study sample reduces many issues associated with sample representativeness that are common in

313 cohort studies, including low participation rates, self-selection, and participants lost to follow-up.  
314 It is also likely to be very representative of patients in routine clinical practice who are felt to be  
315 at increased risk for osteoporosis. In addition, ICS was objectively measured using a prescription  
316 drug database, which eliminates bias due to self-reporting. Our sample likely included patients  
317 with a wide range of risk factors for osteoporosis. To the best of our knowledge, our study is the  
318 first to apply a longitudinal design to a registry-based sample to assess the association between  
319 ICS use and BMD. Further, we determined the impact of ICS independent of well-established  
320 fracture risk factors, as well as other important predictors of bone density including smoking  
321 history and use of osteoporosis drugs or oral corticosteroids. In addition, unobserved, time-fixed  
322 confounding effects were accounted for in the longitudinal analysis because BMD comparisons  
323 were made within patients. This helped enable inference on the causal effects of ICS use on  
324 progressive BMD loss.

325 However, our study also has several limitations. First, we were unable to perform rigorous  
326 adjustment for lung function or the level of systemic inflammation as potentially important  
327 confounders because these parameters were unavailable in the data. These factors can change  
328 rapidly over time and might independently affect BMD. However, we did adjust for disease  
329 severity based on the intensity of resource use for respiratory conditions, which might account  
330 for part of the longitudinal variation in lung function and inflammation. Second, our sample  
331 consisted of patients for whom a BMD scan was requested by their physician. As a result, the  
332 majority of patients with COPD were osteopenic, and the average age of asthma patients was  
333 older (65 years) than is typically observed asthma cohorts. Our findings may not apply to  
334 younger postmenopausal women, or patients who are not already at risk of osteoporosis. Third,

335 the follow-up time in the longitudinal analysis was five years on average, which might not be  
336 long enough to capture the cumulative effects of low-dose ICS use on BMD.

337 In conclusion, our study demonstrates that high-intensity use of ICS therapy slightly accelerates  
338 BMD loss at the hip in postmenopausal women with chronic respiratory diseases. However, this  
339 effect may not be clinically important as it would need to be sustained for over 40 years to  
340 produce one standard deviation reduction in BMD. It is important to balance concerns for the  
341 safety of ICS therapy with its effectiveness in reducing respiratory symptoms and improving  
342 quality of life in patients with COPD and asthma. This is especially the case for asthma, in which  
343 ICS therapy is the cornerstone of disease management<sup>32,33</sup>. The benefits of ICS for patients with  
344 COPD are likely more limited than have historically been reported, and recent data suggests that  
345 ICS may not be required in combination therapy to reduce the risk of exacerbations in certain  
346 patients<sup>34</sup>. Therefore, although our study does not support the discontinuation of long-term ICS  
347 therapy in post-menopausal women with chronic respiratory disease, its negative impacts on  
348 BMD in some patients warrants caution. Future studies should characterize the association  
349 between ICS use and the risk of fractures over a long follow-up period, as this is the final  
350 endpoint most relevant to the health of this population.

## 351 **ACKNOWLEDGEMENTS**

352 The authors acknowledge the Manitoba Centre for Health Policy for use of data contained in the  
353 Manitoba Population Research Data Repository under HIPC Project Number 2011/2012-31).  
354 The results and conclusions are those of the authors and no official endorsement by the Manitoba  
355 Centre for Health Policy, Manitoba Health, or other data providers is intended or should be  
356 inferred. Data used in this study are from the Manitoba Population Research Data Repository

357 housed at the Manitoba Centre for Health Policy, University of Manitoba and were derived from  
358 data provided by Manitoba Health. This article has been reviewed and approved by the members  
359 of the Manitoba Bone Density Program.

360 **REFERENCES**

- 361 1. Global Initiative for Asthma. Global strategy for asthma management and prevention  
362 [Internet]. 2017 [cited 2017 May 5]. Available from: <http://ginasthma.org>
- 363 2. From the Global Strategy for the Diagnosis, Management and Prevention of COPD.  
364 Global Initiative for Chronic Obstructive Lung Disease (GOLD) 2017 [Internet]. [cited 2017  
365 May 1]. Available from: <http://goldcopd.org>
- 366 3. Watz H, Tetzlaff K, Wouters EFM, Kirsten A, Magnussen H, Rodriguez-Roisin R, et al.  
367 Blood eosinophil count and exacerbations in severe chronic obstructive pulmonary disease after  
368 withdrawal of inhaled corticosteroids: a post-hoc analysis of the WISDOM trial. *Lancet Respir*  
369 *Med.* 2016;4:390–8.
- 370 4. Yang IA, Clarke MS, Sim EHA, Fong KM. Inhaled corticosteroids for stable chronic  
371 obstructive pulmonary disease. *Cochrane Database Syst Rev.* 2012;CD002991.
- 372 5. Israel E, Banerjee TR, Fitzmaurice GM, Kotlov TV, LaHive K, LeBoff MS. Effects of  
373 inhaled glucocorticoids on bone density in premenopausal women. *N Engl J Med.*  
374 2001;345:941–7.
- 375 6. Wong CA, Walsh LJ, Smith CJ, Wisniewski AF, Lewis SA, Hubbard R, et al. Inhaled  
376 corticosteroid use and bone-mineral density in patients with asthma. *The Lancet.*  
377 2000;355:1399–403.

- 378 7. Scanlon PD, Connett JE, Wise RA, Tashkin DP, Madhok T, Skeans M, et al. Loss of  
379 bone density with inhaled triamcinolone in Lung Health Study II. *Am J Respir Crit Care Med*.  
380 2004;170:1302–9.
- 381 8. Fujita K, Kasayama S, Hashimoto J, Nagasaka Y, Nakano N, Morimoto Y, et al. Inhaled  
382 corticosteroids reduce bone mineral density in early postmenopausal but not premenopausal  
383 asthmatic women. *J Bone Miner Res*. 2001;16:782–7.
- 384 9. Richy F, Bousquet J, Ehrlich GE, Meunier PJ, Israel E, Morii H, et al. Inhaled  
385 corticosteroids effects on bone in asthmatic and COPD patients: a quantitative systematic review.  
386 *Osteoporos Int*. 2003;14:179–90.
- 387 10. Loke YK, Cavallazzi R, Singh S. Risk of fractures with inhaled corticosteroids in COPD:  
388 systematic review and meta-analysis of randomised controlled trials and observational studies.  
389 *Thorax*. 2011;66:699–708.
- 390 11. Halpern MT, Schmier JK, Van Kerkhove MD, Watkins M, Kalberg CJ. Impact of long-  
391 term inhaled corticosteroid therapy on bone mineral density: results of a meta-analysis. *Ann*  
392 *Allergy Asthma Immunol*. 2004;92:201–7.
- 393 12. Jones A, Fay JK, Burr M, Stone M, Hood K, Roberts G. Inhaled corticosteroid effects on  
394 bone metabolism in asthma and mild chronic obstructive pulmonary disease. *Cochrane Database*  
395 *Syst Rev*. 2002;CD003537.
- 396 13. Leib ES, Saag KG, Adachi JD, Geusens PP, Binkley N, McCloskey EV, et al. Official  
397 Positions for FRAX(®) clinical regarding glucocorticoids: the impact of the use of

- 398 glucocorticoids on the estimate by FRAX(®) of the 10 year risk of fracture from Joint Official  
399 Positions Development Conference of the International Society for Clinical Densitometry and  
400 International Osteoporosis Foundation on FRAX(®). *J Clin Densitom.* 2011;14:212–9.
- 401 14. Papaioannou A, Morin S, Cheung AM, Atkinson S, Brown JP, Feldman S, et al. 2010  
402 clinical practice guidelines for the diagnosis and management of osteoporosis in Canada:  
403 summary. *Can Med Assoc J.* 2010;182:1864–73.
- 404 15. Government of Canada SC. Population by sex and age group, by province and territory  
405 (Number, both sexes) [Internet]. 2014 [cited 2015 Feb 6]. Available from:  
406 <http://www.statcan.gc.ca/tables-tableaux/sum-som/101/cst01/demo31a-eng.htm>
- 407 16. Roos NP, Black C, Roos LL, Frohlich N, DeCoster C, Mustard C, et al. Managing health  
408 services: how the Population Health Information System (POPULIS) works for policymakers.  
409 *Med Care.* 1999;37:JS27-41.
- 410 17. Kozyrskyj AL, Mustard CA. Validation of an electronic, population-based prescription  
411 database. *Ann Pharmacother.* 1998;32:1152–7.
- 412 18. Lix LM, Kuwornu JP, Kroeker K, Kephart G, Sikdar KC, Smith M, et al. Estimating the  
413 completeness of physician billing claims for diabetes case ascertainment using population-based  
414 prescription drug data. *Health Promot Chronic Dis Prev Can.* 2016;36:54–60.
- 415 19. Leslie WD, Metge C. Establishing a regional bone density program: lessons from the  
416 Manitoba experience. *J Clin Densitom.* 2003;6:275–82.



- 417 20. Leslie WD, Caetano PA, Macwilliam LR, Finlayson GS. Construction and validation of a  
418 population-based bone densitometry database. *J Clin Densitom.* 2005;8:25–30.
- 419 21. Kanis JA, McCloskey EV, Johansson H, Oden A, Melton LJ, Khaltayev N. A reference  
420 standard for the description of osteoporosis. *Bone.* 2008;42:467–75.
- 421 22. Kanis JA, Hans D, Cooper C, Baim S, Bilezikian JP, Binkley N, et al. Interpretation and  
422 use of FRAX in clinical practice. *Osteoporos Int.* 2011;22:2395–411.
- 423 23. Watts NB, Leslie WD, Foldes AJ, Miller PD. 2013 International Society for Clinical  
424 Densitometry Position Development Conference: Task Force on Normative Databases. *J Clin*  
425 *Densitom.* 2013;16:472–81.
- 426 24. Leslie WD, Majumdar SR, Morin SN, Lix LM. Change in Bone Mineral Density Is an  
427 Indicator of Treatment-Related Antifracture Effect in Routine Clinical Practice: A Registry-  
428 Based Cohort Study. *Ann Intern Med.* 2016;165:465–72.
- 429 25. Kanis JA, McCloskey EV, Johansson H, Oden A, Ström O, Borgström F. Development  
430 and use of FRAX in osteoporosis. *Osteoporos Int.* 2010;21 Suppl 2:S407-413.
- 431 26. Leslie WD. Factors affecting short-term bone density precision assessment and the effect  
432 on patient monitoring. *J Bone Miner Res.* 2008;23:199–204.
- 433 27. Baim S, Wilson CR, Lewiecki EM, Luckey MM, Downs RW, Lentle BC. Precision  
434 assessment and radiation safety for dual-energy X-ray absorptiometry: position paper of the  
435 International Society for Clinical Densitometry. *J Clin Densitom.* 2005;8:371–8.

- 436 28. Lam WY, Fresco P. Medication Adherence Measures: An Overview. *BioMed Res Int.*  
437 2015;217047. doi: 10.1155/2015/217047.
- 438 29. Gonzalez AV, Coulombe J, Ernst P, Suissa S. Long-term use of inhaled corticosteroids in  
439 COPD and the risk of fracture. *Chest.* 2017;doi: 10.1016/j.chest.2017.07.002.
- 440 30. van Staa TP, Leufkens HG, Cooper C. Use of inhaled corticosteroids and risk of  
441 fractures. *J Bone Miner Res.* 2001;16:581–8.
- 442 31. Tattersfield AE, Town GI, Johnell O, Picado C, Aubier M, Braillon P, et al. Bone mineral  
443 density in subjects with mild asthma randomised to treatment with inhaled corticosteroids or  
444 non-corticosteroid treatment for two years. *Thorax.* 2001;56:272–8.
- 445 32. Alvarez GG, Schulzer M, Jung D, Fitzgerald JM. A systematic review of risk factors  
446 associated with near-fatal and fatal asthma. *Can Respir J.* 2005;12:265–70.
- 447 33. Ernst P, Spitzer WO, Suissa S, Cockcroft D, Habbick B, Horwitz RI, et al. Risk of fatal  
448 and near-fatal asthma in relation to inhaled corticosteroid use. *JAMA.* 1992;268:3462–4.
- 449 34. Magnussen H, Disse B, Rodriguez-Roisin R, Kirsten A, Watz H, Tetzlaff K, et al.  
450 Withdrawal of inhaled glucocorticoids and exacerbations of COPD. *N Engl J Med.*  
451 2014;371:1285–94.
